# Supplementary material for: Effects of Ozone Oxidation Process on Residual Antibiotics and Antibiotic Resistance Genes in a Swine Wastewater Treatment Plant
Source: MDPI journal article supplement (doi:10.3390/app15095158), 2025-05-06
Supplement: s1 [file applsci-3589717-supplementary.pdf › applsci-3589717-supplementary.pdf]

## **Supplementary Materials**

### **Effects of Ozone Oxidation Process on Residual Antibiotics and Antibiotic Resistance Genes (ARGs) in the Swine Wastewater Treatment Plant**

Taeyoung Cha <sup>1</sup>, Min-Sang Kim <sup>1</sup>, Yuhoon Hwang <sup>2</sup>, Eun sook Jeong <sup>3</sup>, Hongmok Jo <sup>1,\*</sup>  
and Si-Kyung Cho <sup>1,\*</sup>

1 Department of Biological and Environmental Science, Dongguk University, 32 Dongguk-ro, Ilsandong-gu, Goyang, Gyeonggi-do, Republic of Korea; pncbio@nate.com

2 Department of Environmental Engineering, Seoul National University of Science and Technology, Seoul, Republic of Korea; yhhwang@seoultech.ac.kr

3 Institute of Environmental Technology, Seoul National University of Science and Technology, Seoul, Re-public of Korea; es909@seoultech.ac.kr

\* Correspondence: hm.jo@dgu.ac.kr (HJ) and sk.cho@dgu.ac.kr (SKC) contributed equally as corresponding authors.

**The following are included as supplementary information for this paper:**

**Number of tables: 2**

**Number of figure: 0**

**References: 3**

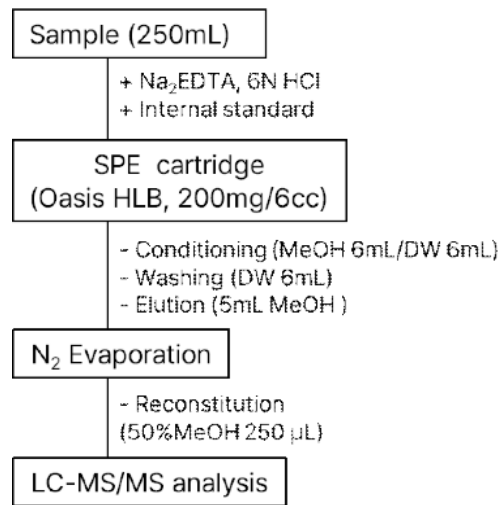

**Figure S1. Sample Preparation Procedures for the Determination of Antibiotic Residues**

**Table S1. Quality Assurance and Quality Control of Antibiotics.**

| <b>Target antibiotics</b> | <b>Method detection limit<br/>(MDL)<br/>(ng/L)</b> | <b>Limit of quantification<br/>(LOQ)<br/>(ng/L)</b> | <b>Precision<br/>(%)</b> | <b>Accuracy<br/>(%)</b> |
|---------------------------|----------------------------------------------------|-----------------------------------------------------|--------------------------|-------------------------|
| Lincomycin                | 0.06                                               | 0.18                                                | 6.8                      | 93.1                    |
| Sulfamethazine            | 0.10                                               | 0.31                                                | 5.5                      | 106.1                   |
| Tiamulin                  | 0.03                                               | 0.10                                                | 5.4                      | 101.6                   |
| Trimethoprim              | 0.05                                               | 0.16                                                | 5.3                      | 106.6                   |
| Marbofloxacin             | 1.0                                                | 3.1                                                 | 1.8                      | 88.5                    |
| Oxytetracycline           | 0.27                                               | 0.87                                                | 5.5                      | 103.2                   |
| Chlortetracycline         | 0.27                                               | 0.86                                                | 14.2                     | 87.4                    |
| Fenbendazole              | 0.16                                               | 0.52                                                | 10.2                     | 99.8                    |

**Table S2. Selected reaction monitoring (SRM) mode condition.**

| antibiotics              | ESI mode | Precursor ion (m/z) | Product ion (CE, eV) |                    |
|--------------------------|----------|---------------------|----------------------|--------------------|
|                          |          |                     | Quantification       | Qualification      |
| Lincomycin               | Positive | 407                 | 126 (29)             | 359 (19), 389 (17) |
| Sulfamethazine           | Positive | 279                 | 186 (16)             | 124 (23), 156 (19) |
| Tiamulin                 | Positive | 494                 | 119 (37)             | 192 (21), 285 (22) |
| Trimethoprim             | Positive | 291                 | 261 (25)             | 230 (24), 275 (25) |
| Marbofloxacin            | Positive | 363                 | 72 (22)              | 320 (15), 345 (20) |
| Oxytetracycline          | Positive | 461                 | 426 (18)             | 337 (29), 443 (13) |
| Chlortetracycline        | Positive | 479                 | 444 (21)             | 303 (36), 462 (17) |
| Fenbendazole             | Positive | 300                 | 159 (34)             | 190 (31), 268 (21) |
| Sulfadimethoxine-d6 (IS) | Positive | 317                 | 162 (22)             |                    |
| Enrofloxacin-d5 (IS)     | Positive | 365                 | 321(20)              |                    |
| Meclocycline (IS)        | Positive | 477                 | 460(17)              |                    |

**Table S3. Primers used for qPCR.**

| Gene target | Primers | Sequence (5'-3')        | Annealing temperature (°C) | Amplicon size (bp) | R <sup>2</sup> | References         |
|-------------|---------|-------------------------|----------------------------|--------------------|----------------|--------------------|
| <i>tetB</i> | Forward | GGTTGAGACGCAATCGAATT    | 52.9                       | 206                | 0.9895         | Mao et al. (2015)  |
|             | Reverse | AGGCTTGAATACTGAGTGTA    |                            |                    |                |                    |
| <i>tetM</i> | Forward | ACAGAAAGCTTATTATATAAC   | 60.0*                      | 171                | 0.9583         | Mao et al. (2015)  |
|             | Reverse | TGGCGTGTCTATGATGTTTAC   |                            |                    |                |                    |
| <i>sul1</i> | Forward | CGCACCGGAAACATCGCTGCAC  | 56.0*                      | 163                | 0.9188         | Pei et al. (2006)  |
|             | Reverse | TGAAGTTCCGCCGCAAGGCTCG  |                            |                    |                |                    |
| <i>sul2</i> | Forward | TCCGGTGGAGGCCGGTATCTGG  | 60.0                       | 191                | 0.9721         | Pei et al. (2006)  |
|             | Reverse | CGGGAATGCCATCTGCCTTGAG  |                            |                    |                |                    |
| <i>ermB</i> | Forward | CGTGCGTCTGACATCTATCTGA  | 56.8                       | 190                | 0.9893         | Mao et al. (2015)  |
|             | Reverse | CTGTGGTATGGCGGGTAAAGTT  |                            |                    |                |                    |
| <i>qnrA</i> | Forward | GATAAAGTTTTTCAGCAAGAGG  | 55.0                       | 543                | 0.8518         | Mao et al. (2015)  |
|             | Reverse | ATCCAGATCGGCAAAGGTTA    |                            |                    |                |                    |
| <i>qnrS</i> | Forward | GTATAGAGTTCCGTGCGTGTGA  | 54.6                       | 189                | 0.8349         | Mao et al. (2015)  |
|             | Reverse | GGTTCGTTCCCTATCCAGCGATT |                            |                    |                |                    |
| <i>floR</i> | Forward | GTCATTCTCACCTTCATCCTAC  | 63.0                       | 243                | 0.9516         | Khan et al. (2011) |
|             | Reverse | GACACCAGCACTGCCATTG     |                            |                    |                |                    |

## References

- Khan, S.A., Sung, K. and Nawaz, M.S., 2011. Detection of *aacA-aphD*, *qacE $\delta$ 1*, *marA*, *floR*, and *tetA* genes from multidrug-resistant bacteria: Comparative analysis of real-time multiplex PCR assays using EvaGreen® and SYBR® Green I dyes. *Molecular and cellular probes*, 25(2-3), pp.78-86.
- Mao, D., Yu, S., Rysz, M., Luo, Y., Yang, F., Li, F., Hou, J., Mu, Q., Alvarez, P.J.J., 2015. Prevalence and proliferation of antibiotic resistance genes in two municipal wastewater treatment plants. *Water Res.* 85, 458–466.
- Pei, R., Kim, S.-C., Carlson, K.H., Pruden, A., 2006. Effect of river landscape on the sediment concentrations of antibiotics and corresponding antibiotic resistance genes (ARG). *Water Res.* 40, 2427–2435.
